# Supplementary material for: Enhancing the output performance of hybrid nanogenerators based on Al-doped BaTiO3 composite films: a self-powered utility system for portable electronics
Source: Royal Society of Chemistry journal article supplement (doi:10.1039/c8ta04612c), 2018-01-01
Supplement: c8ta04612c1.pdf [file c8ta04612c1.pdf]

## Electronic Supplementary Information

### Enabling output performance of hybrid nanogenerators based on Al-doped BaTiO<sub>3</sub> composite films: A self-powered utility system for portable electronics

*Bhaskar Dudem<sup>a, ‡</sup>, L. Krishna Bharat<sup>a,b, ‡</sup>, Harishkumarreddy Patnam<sup>a</sup>, Anki Reddy Mule<sup>a</sup>, and Jae Su Yu<sup>a\*</sup>*

<sup>a</sup>Department of Electronic Engineering, Kyung Hee University, 1732 Deogyong-daero, Giheung-gu, Yongin-si, Gyeonggi-do 446-701, South Korea.

<sup>b</sup>Center of Biomedical Engineering, Institute of Molecular Medicine, Sechenov University, Moscow Russia.

\*Corresponding author. Email address: [jsyu@khu.ac.kr](mailto:jsyu@khu.ac.kr) (Prof. J. S. Yu)

<sup>‡</sup> These authors are equally contributed.

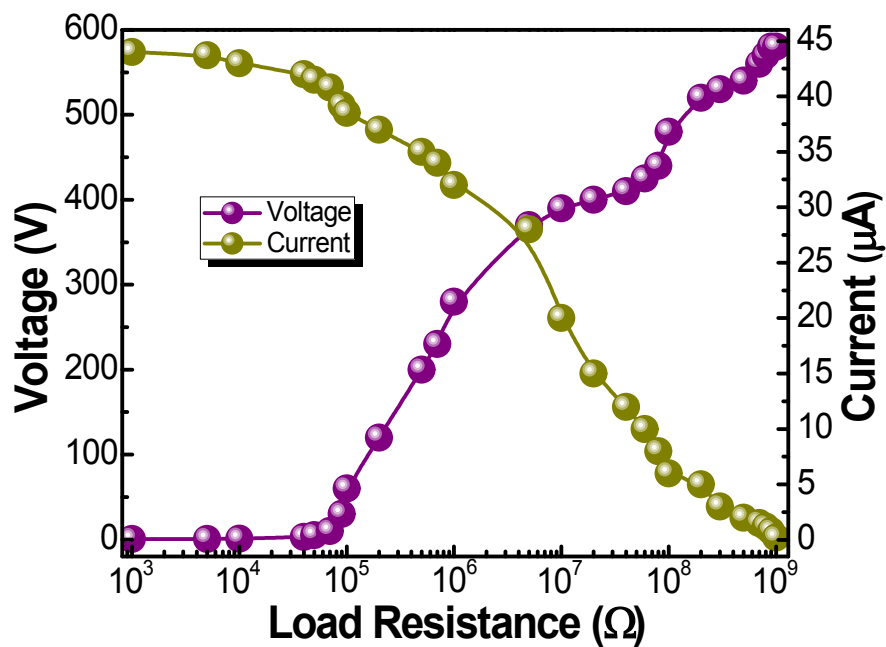

**Figure S1.** Output voltage and current of the HNG device with smooth surface of ABTO/PDMS film at different external load resistances from  $10^3$  to  $10^9 \Omega$ .

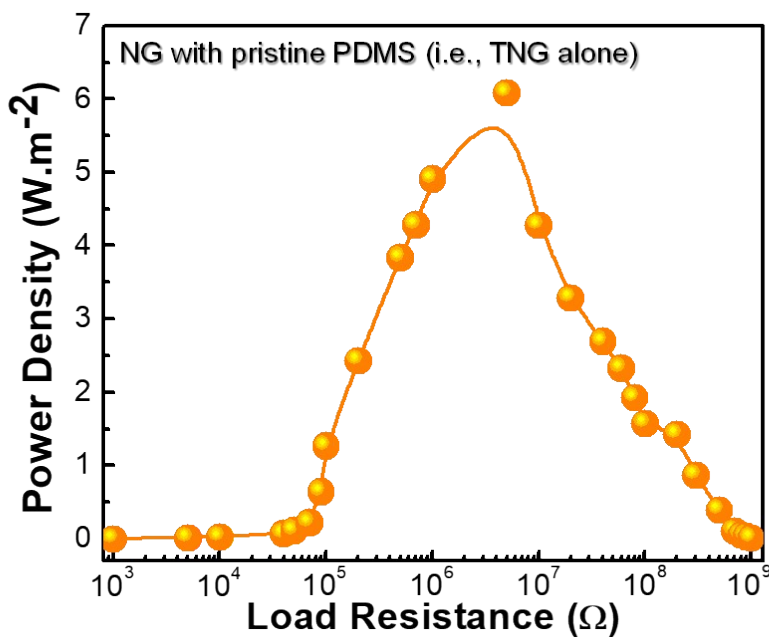

**Figure S2.** Power density of the NG device with pristine PDMS (i.e., TNG with only PDMS) at different external load resistances from  $10^3$  to  $10^9 \Omega$ .

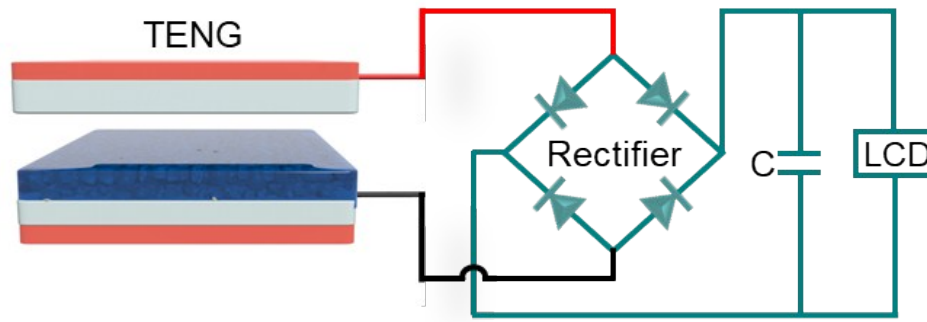

**Figure S3.** (a) Schematic diagram of the rectifying circuit to charge the capacitor by the HNG with rough composite, and further to turn on the LCD screen.

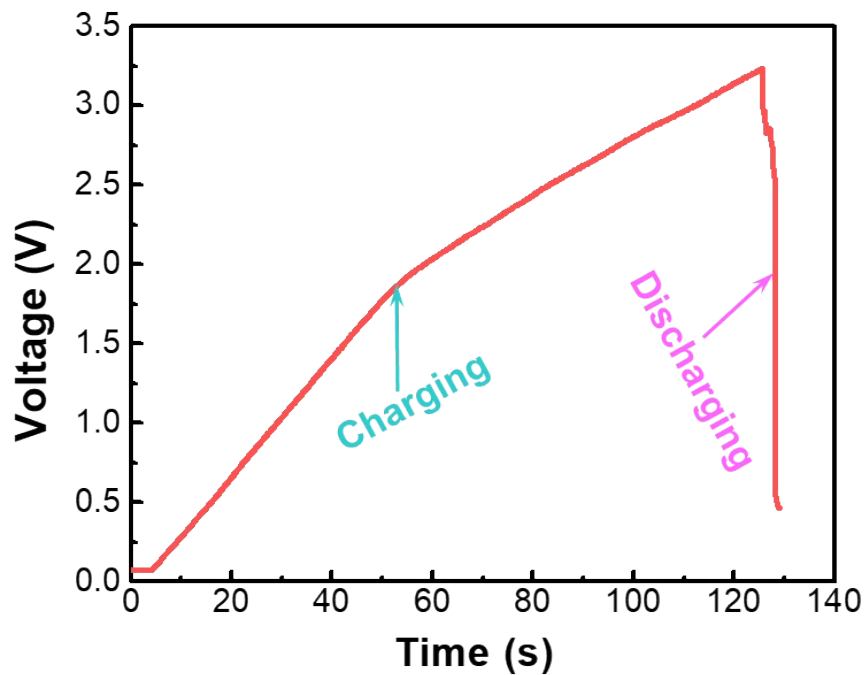

**Figure S4.** (a) Charge and discharge voltage curves of the 22  $\mu\text{F}$  capacitor. Herein, the capacitor was charged by the rectified voltage generated from the HNG and further supplied (discharged) to turn on the LCD screen.
